# Supplementary figures and images for: Analysis of the Effects of Ninjin’yoeito on Physical Frailty in Mice
Source: MDPI journal article supplement (doi:10.3390/ijms231911183), 2022-09-23

Figure S1.

**A**

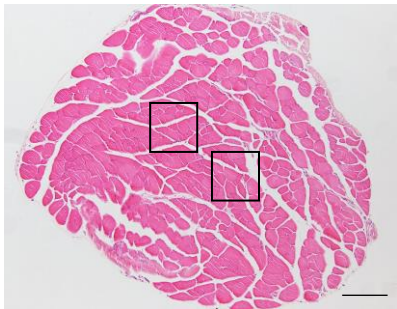

**B**

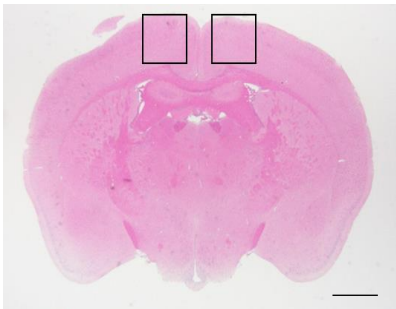

Supplement: s1 [file s1]
